# Supplementary material
Source: Research Square preprint supplement (doi:10.21203/rs.3.rs-9708926/v1)
Supplement: Supplementary file 1 [file 828bb31af9acc55e5a640904.docx]

#
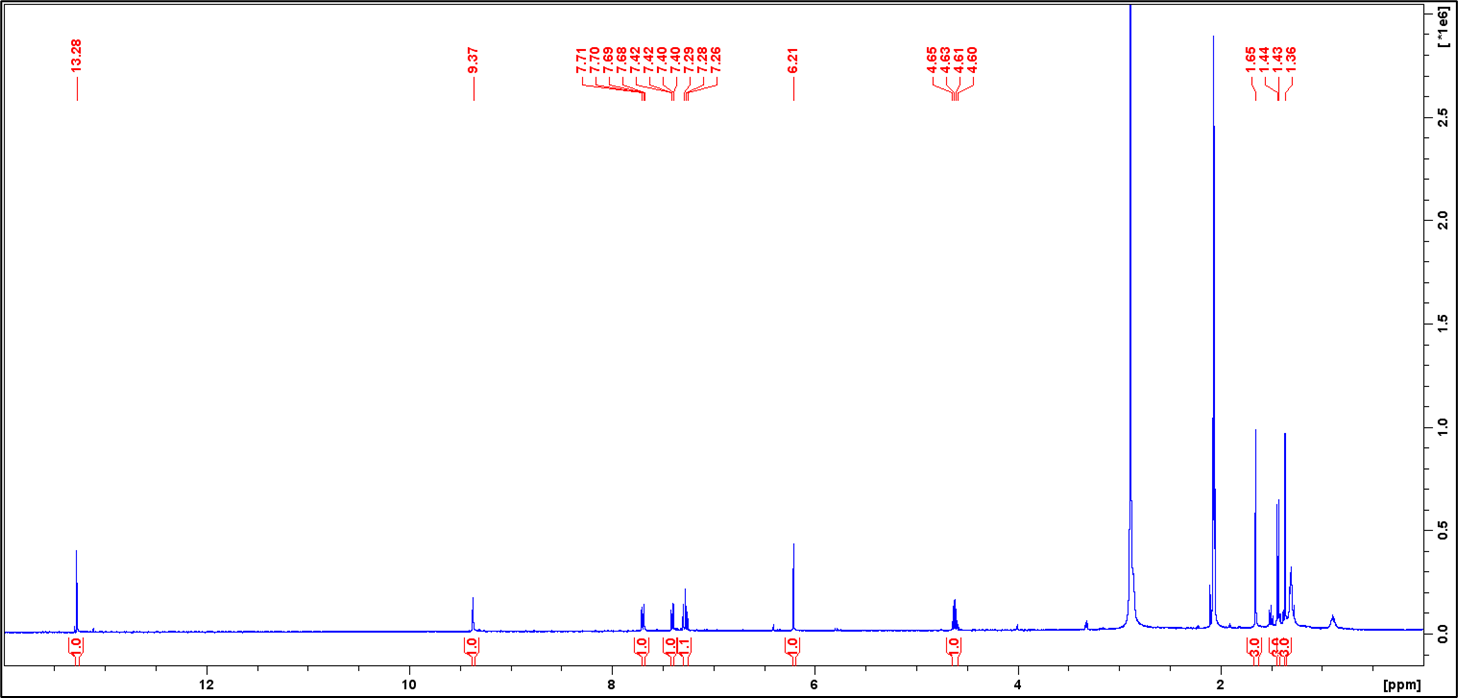


Figure S1. 1H NMR spectrum of Austrocoriaxanthone (d-acetone, 400 MHz)


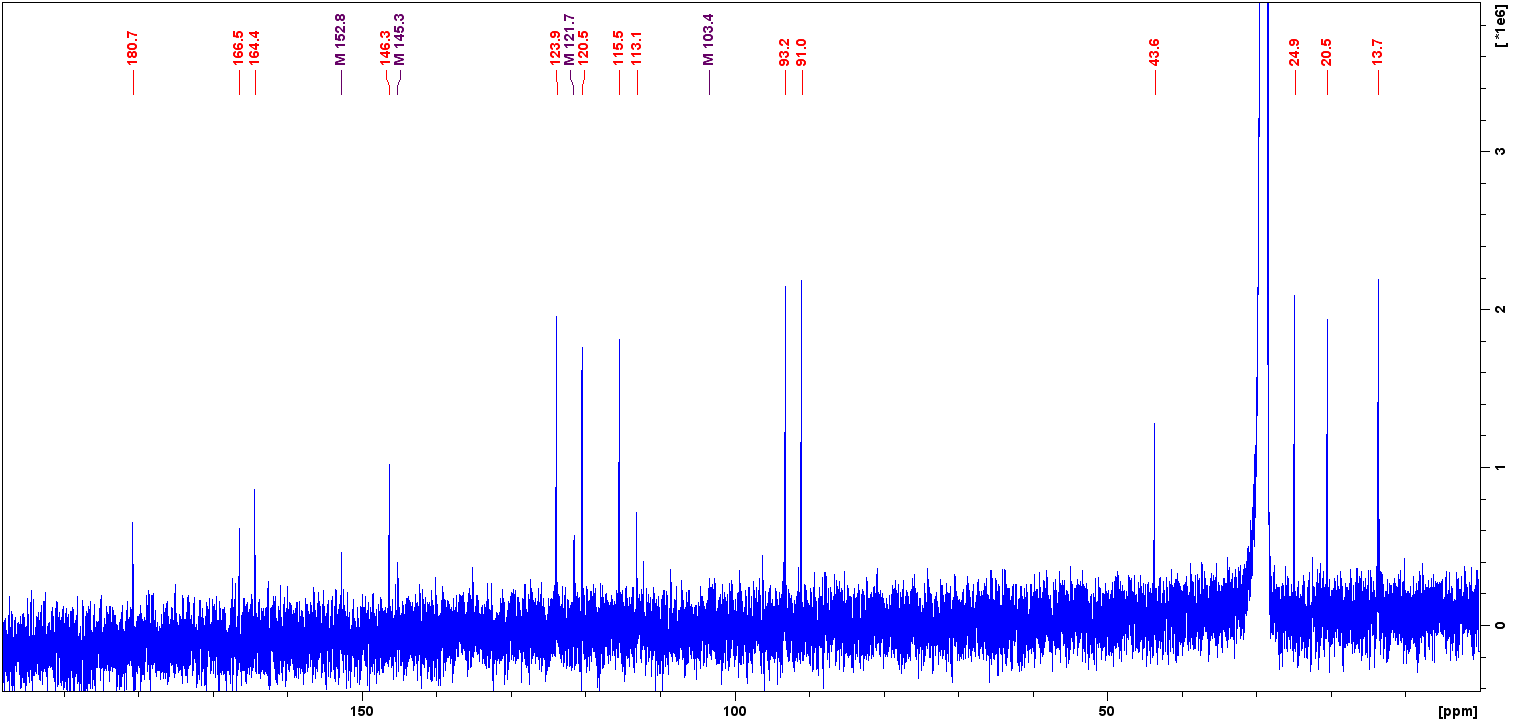


Figure S2. 13C NMR spectrum of Austrocoriaxanthone(d-acetone, 100 MHz)


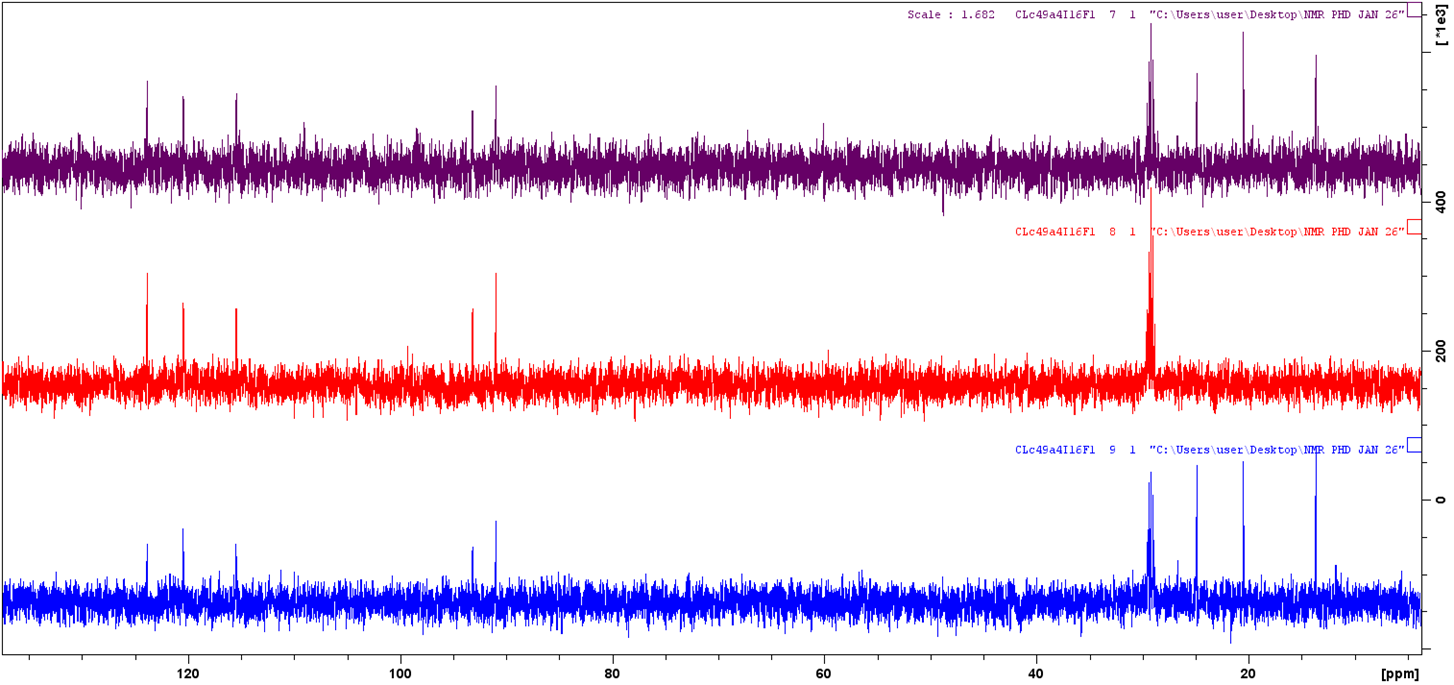


DEPT-45

DEPT-90

DEPT-135

Figure S3. DEPT Spectra of Austrocoriaxanthone


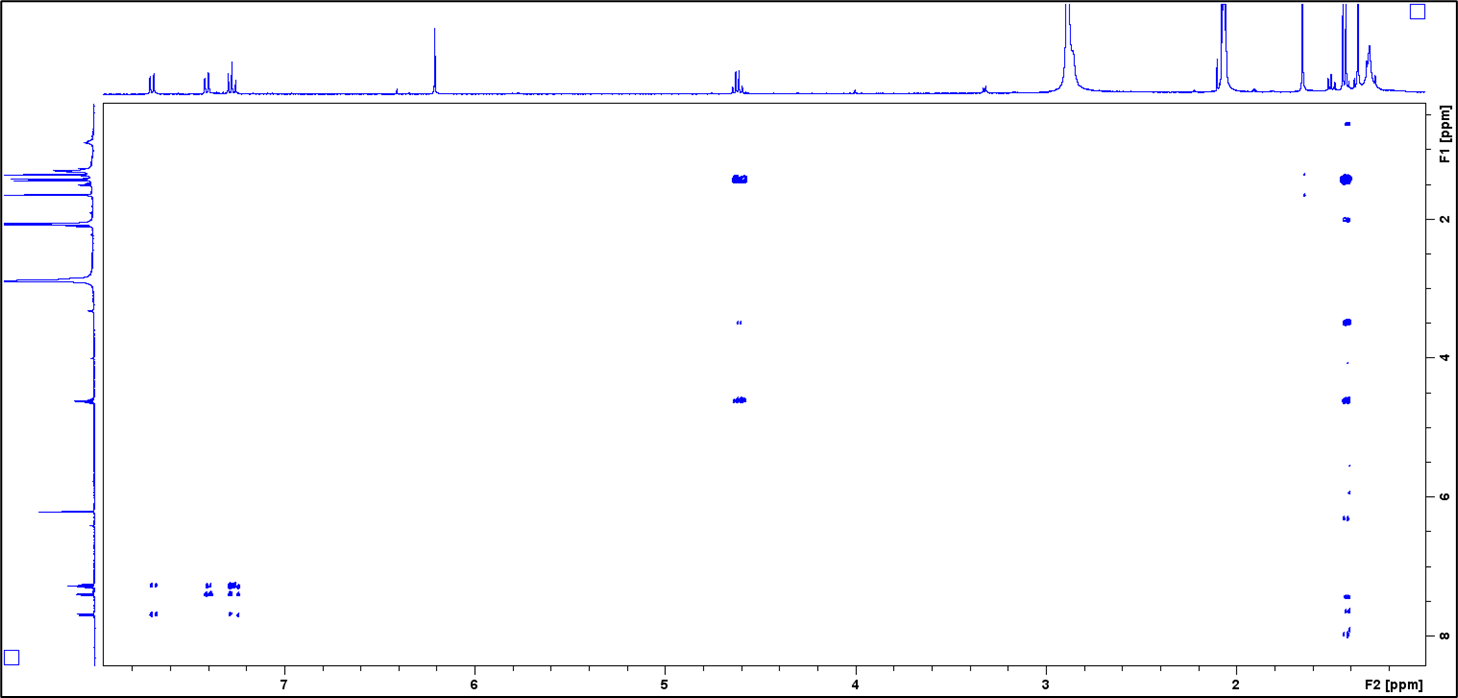


Figure S4. COSY Spectra of Austrocoriaxanthone


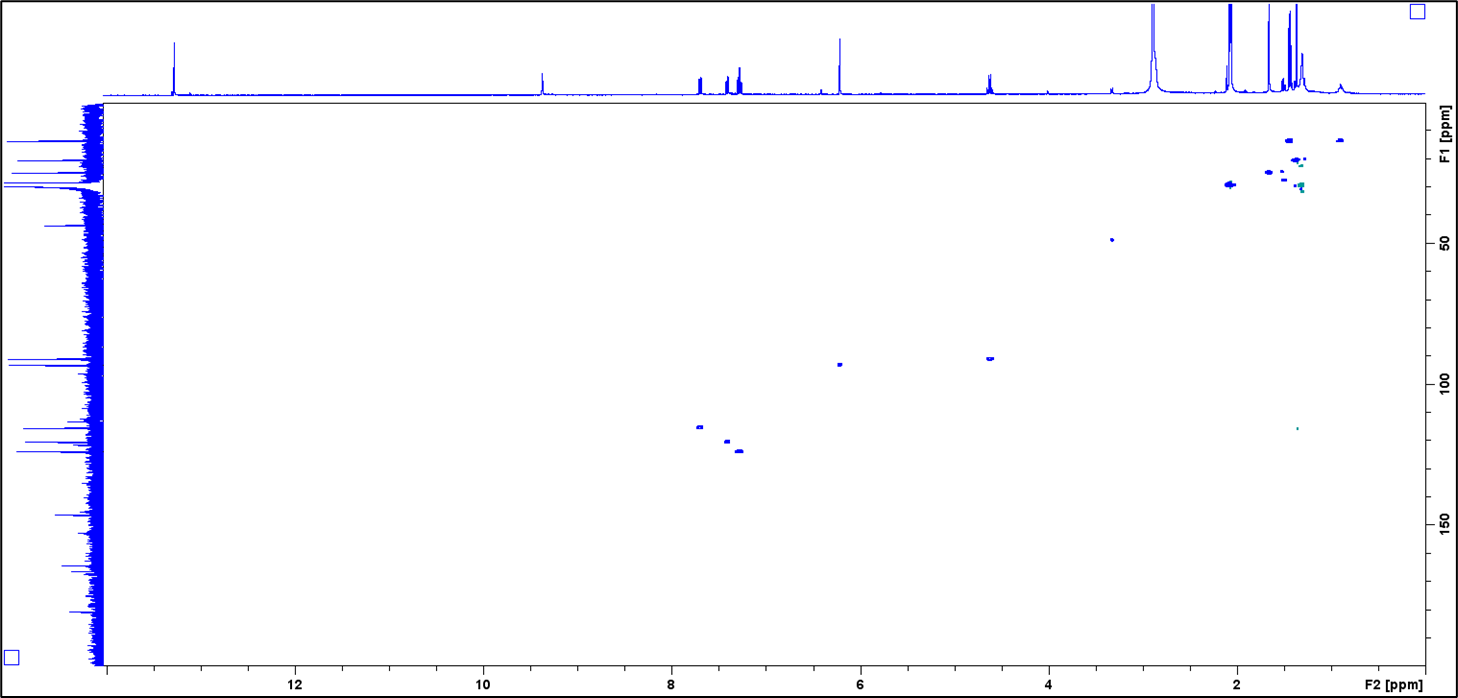


Figure S5. HSQC Spectra of Austrocoriaxanthone


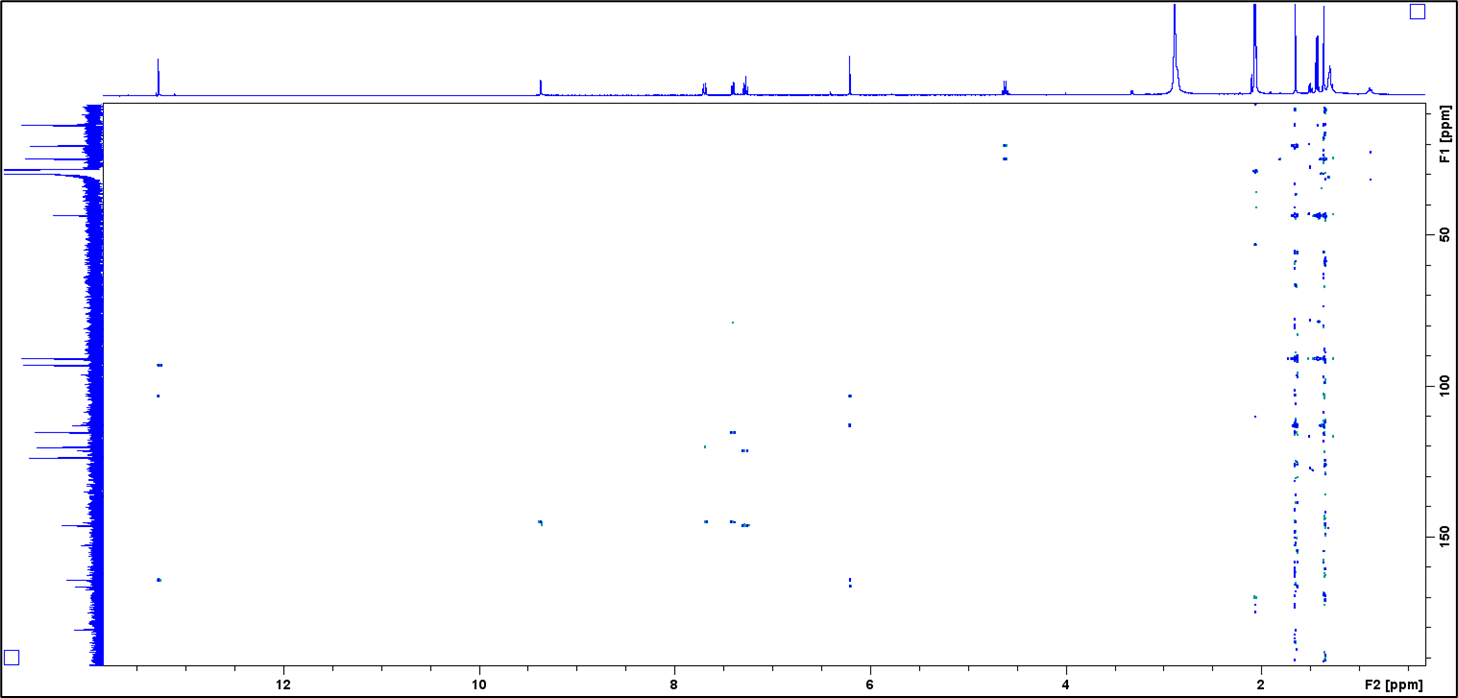


Figure S6. HMBC Spectra of Austrocoriaxanthone


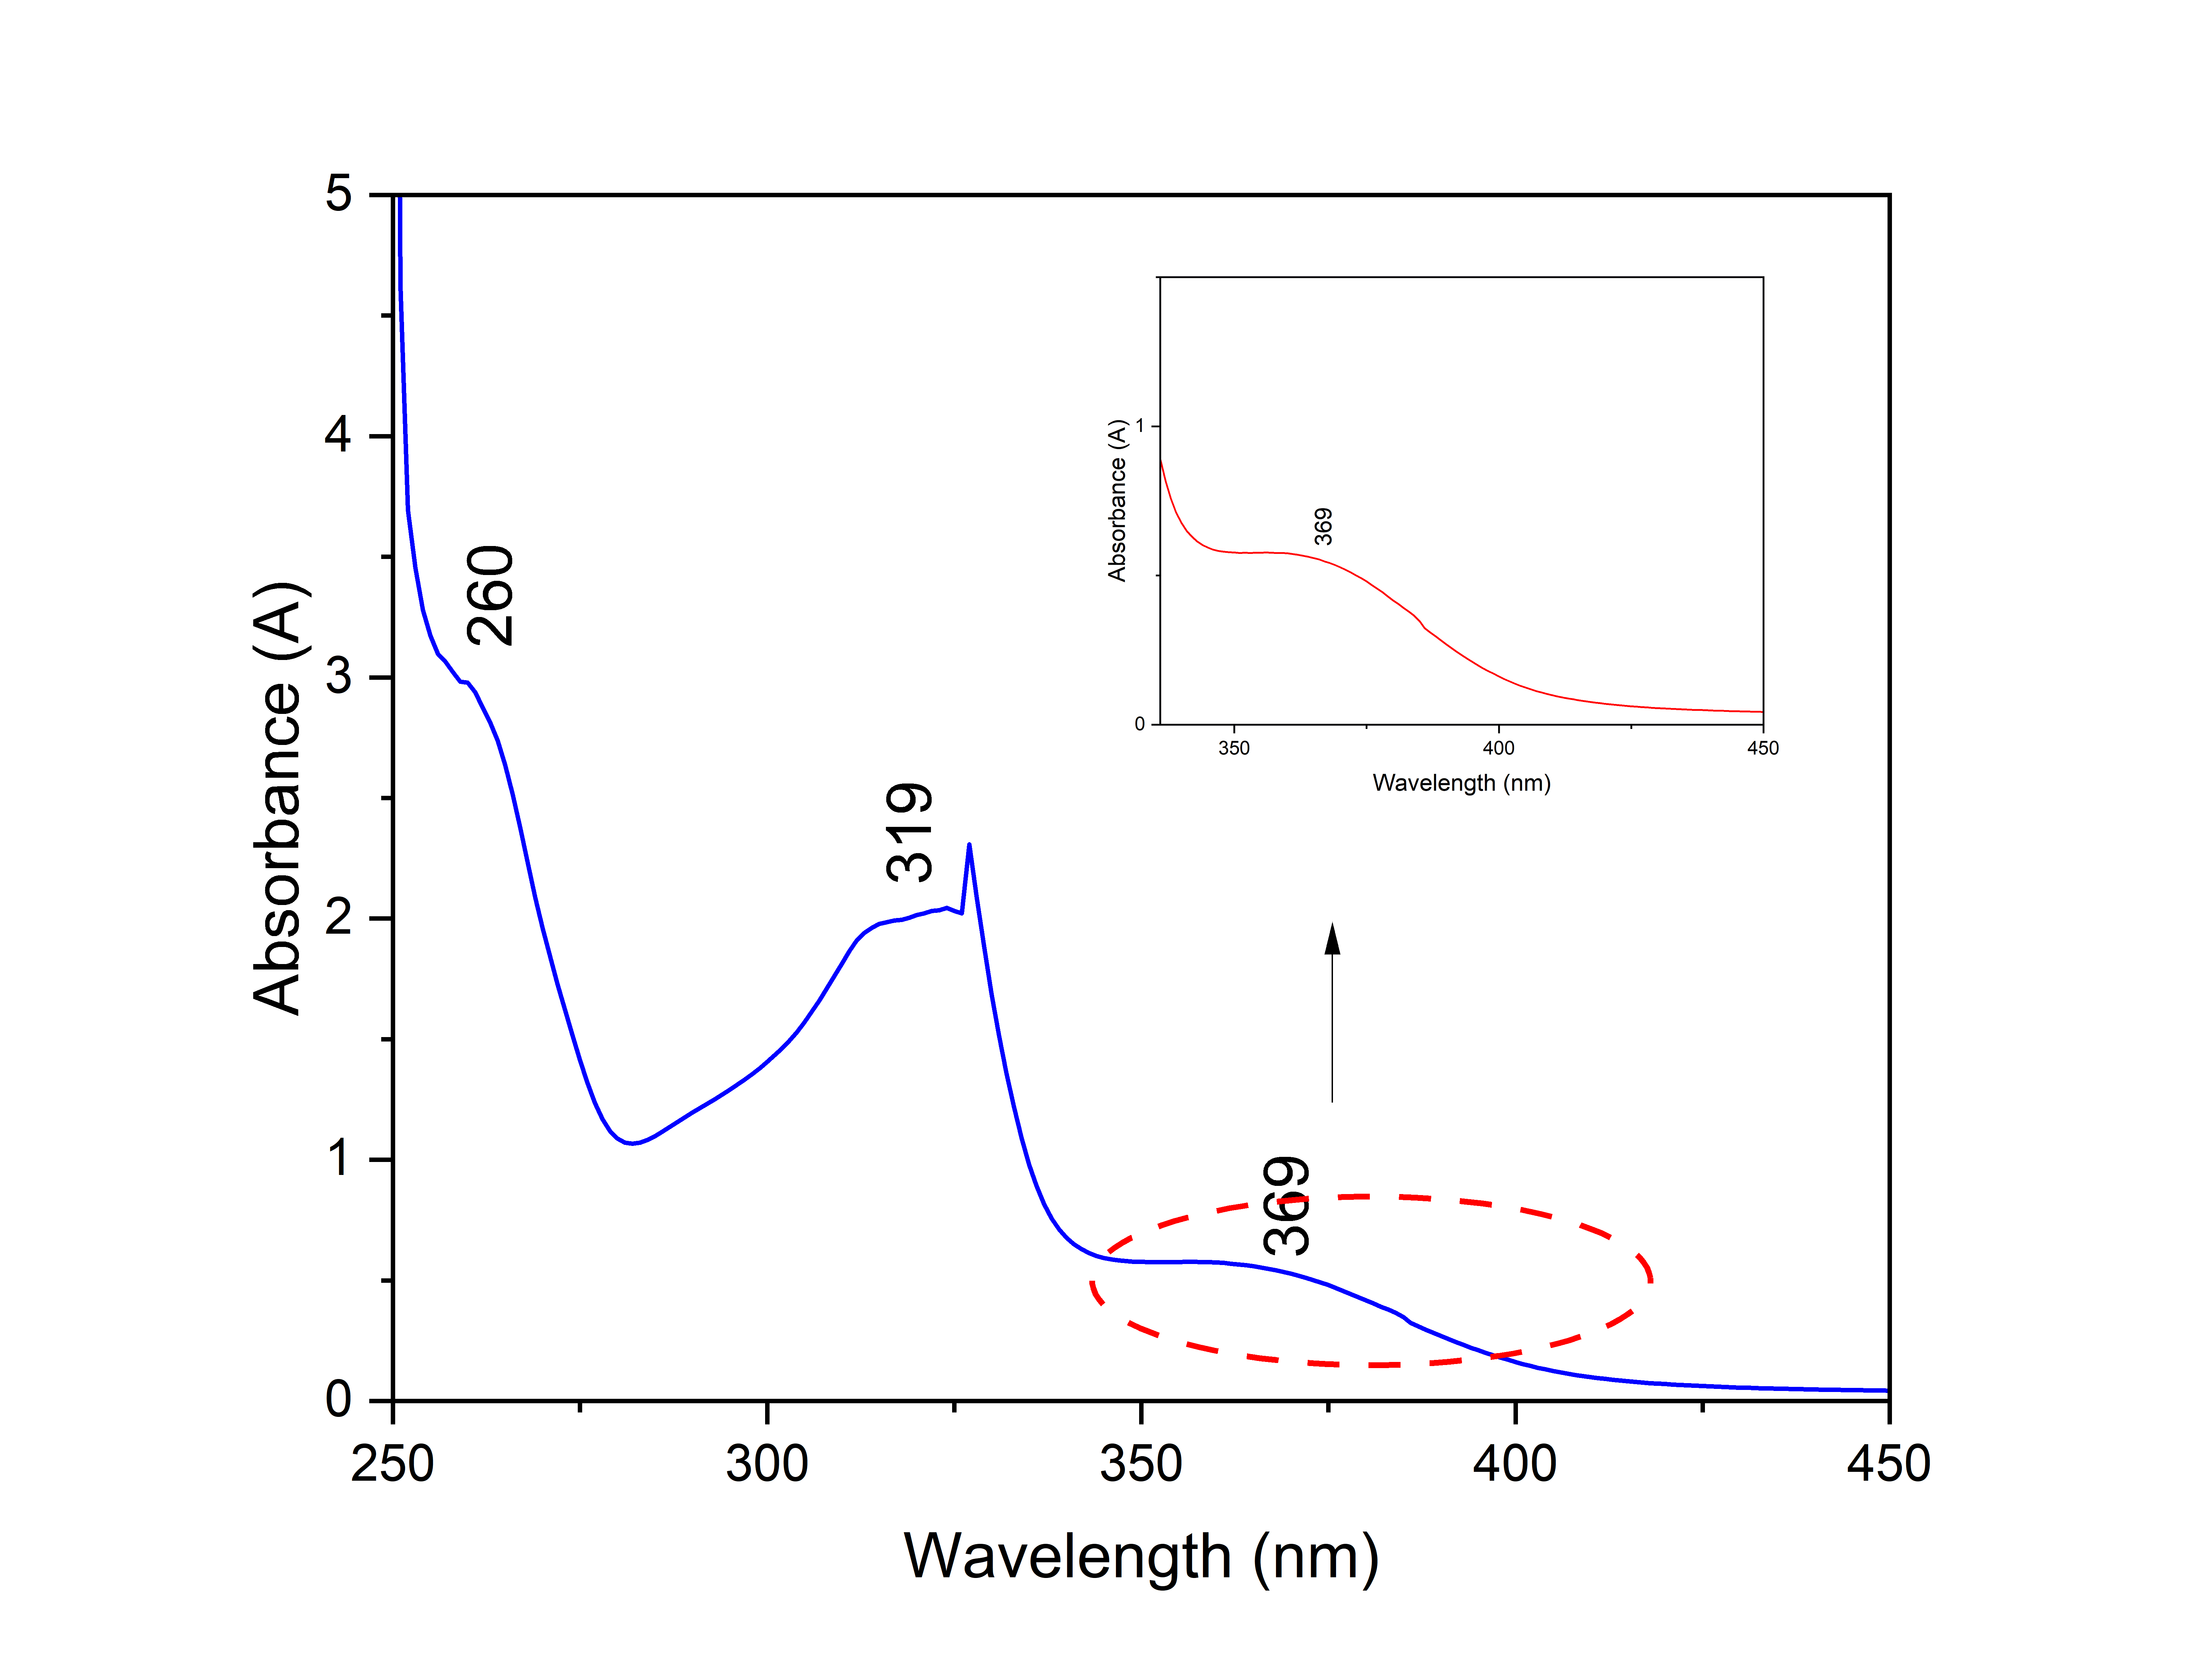


Figure S7. UV- vis Spectra of Austrocoriaxanthone


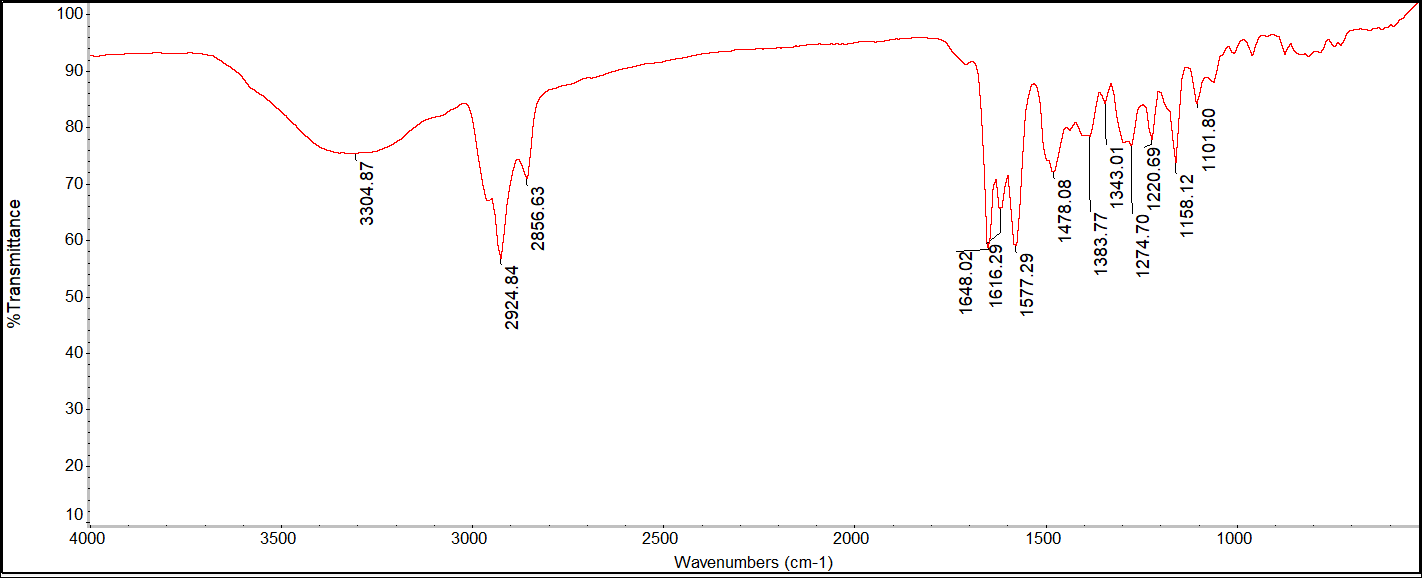


Figure S8. FT-IR Spectra of Austrocoriaxanthone
